# Supplementary material for: Geological-geotechnical analysis of a rock-toppling prone canyon in Furnas, Brazil, after a fatal event
Source: Copernicus journal article supplement (doi:10.5194/egusphere-2025-1248), 2025-06-27
Supplement: Supplementary file 1 [file egusphere-2025-1248-supplement.pdf]

Supplementary Information

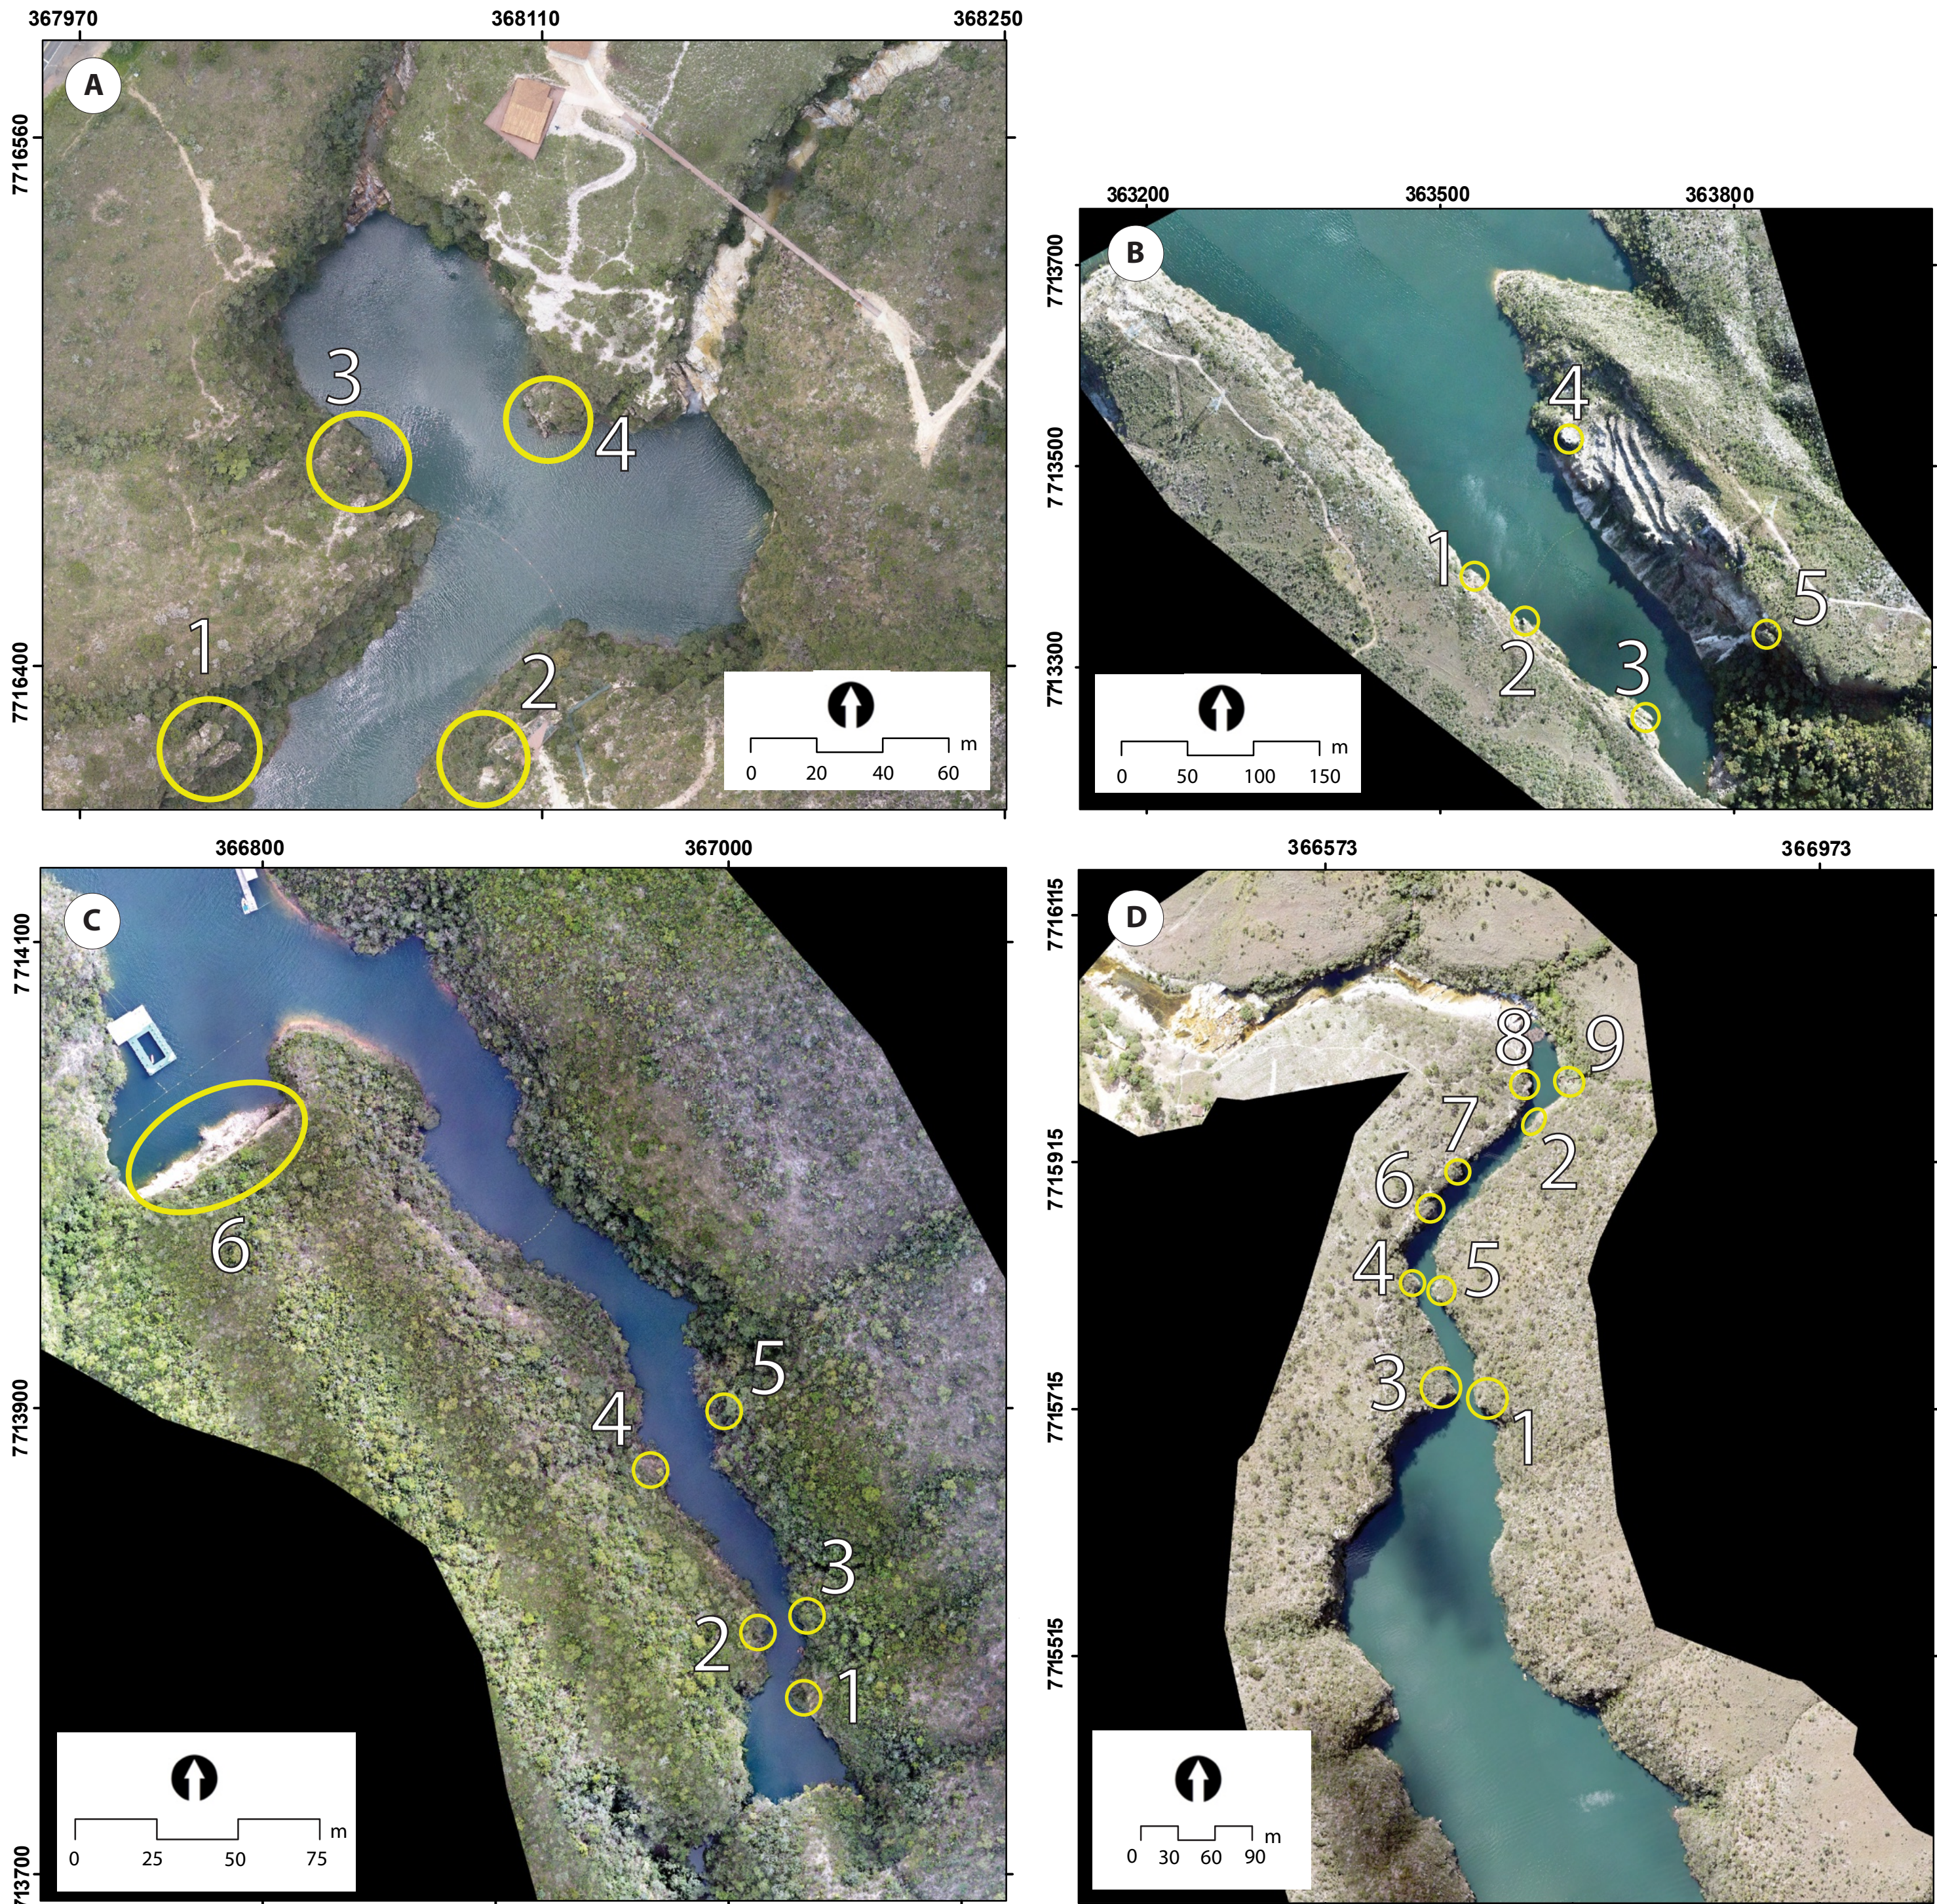

**Figure S1:** The yellow circles represent the sites where retention structures or removal/destruction of rock blocks should be considered. Numbers represent priority.
